# Supplementary material
Source: PubMed Central journal article supplement (PMC7677223)

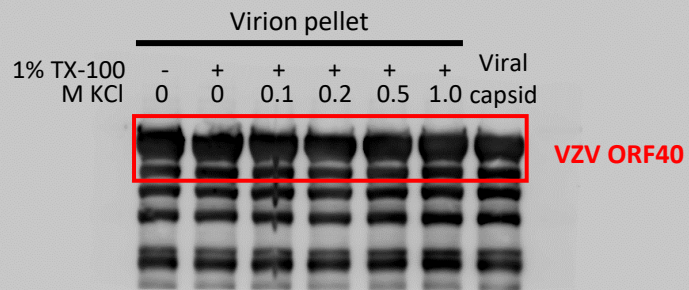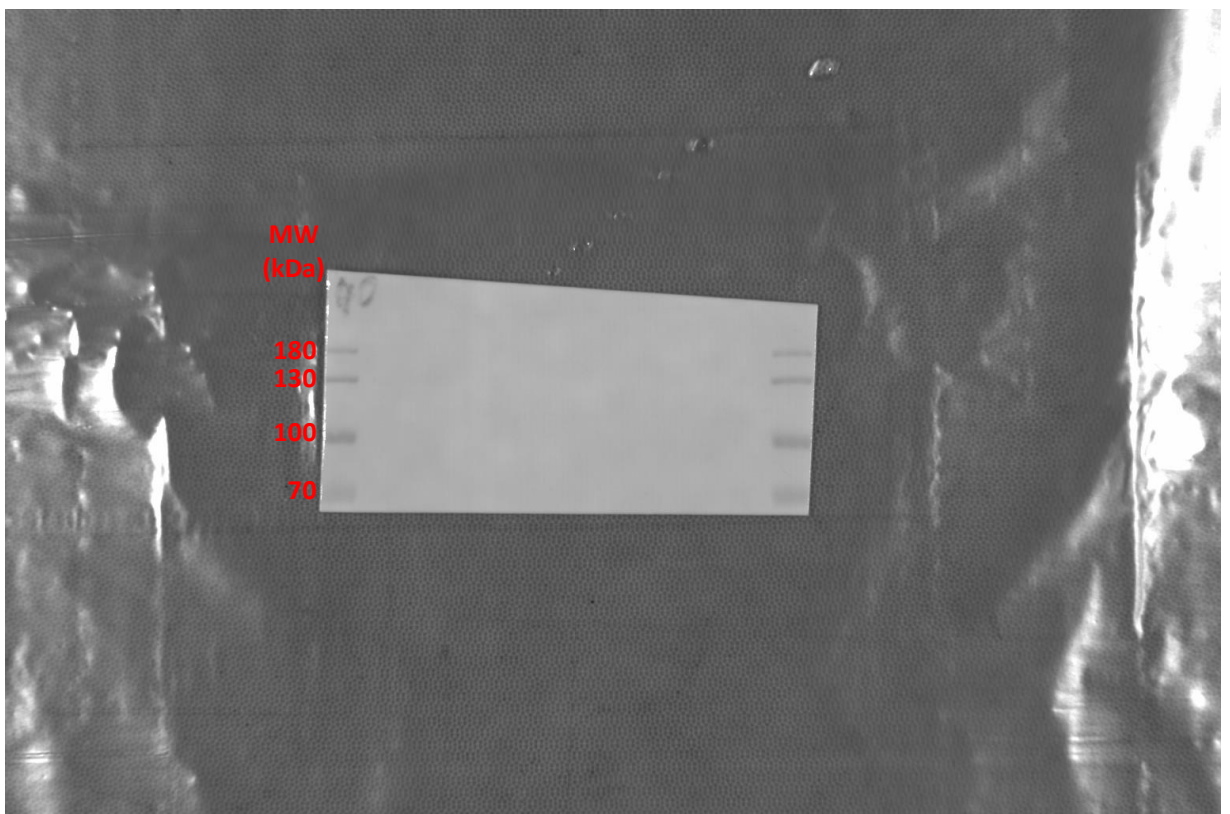

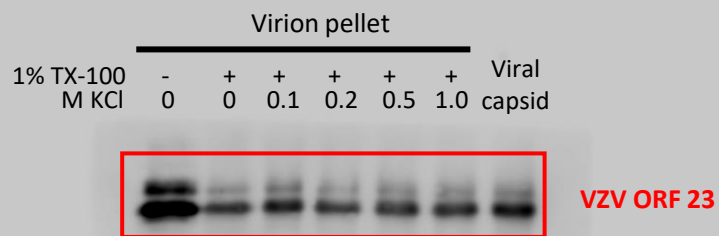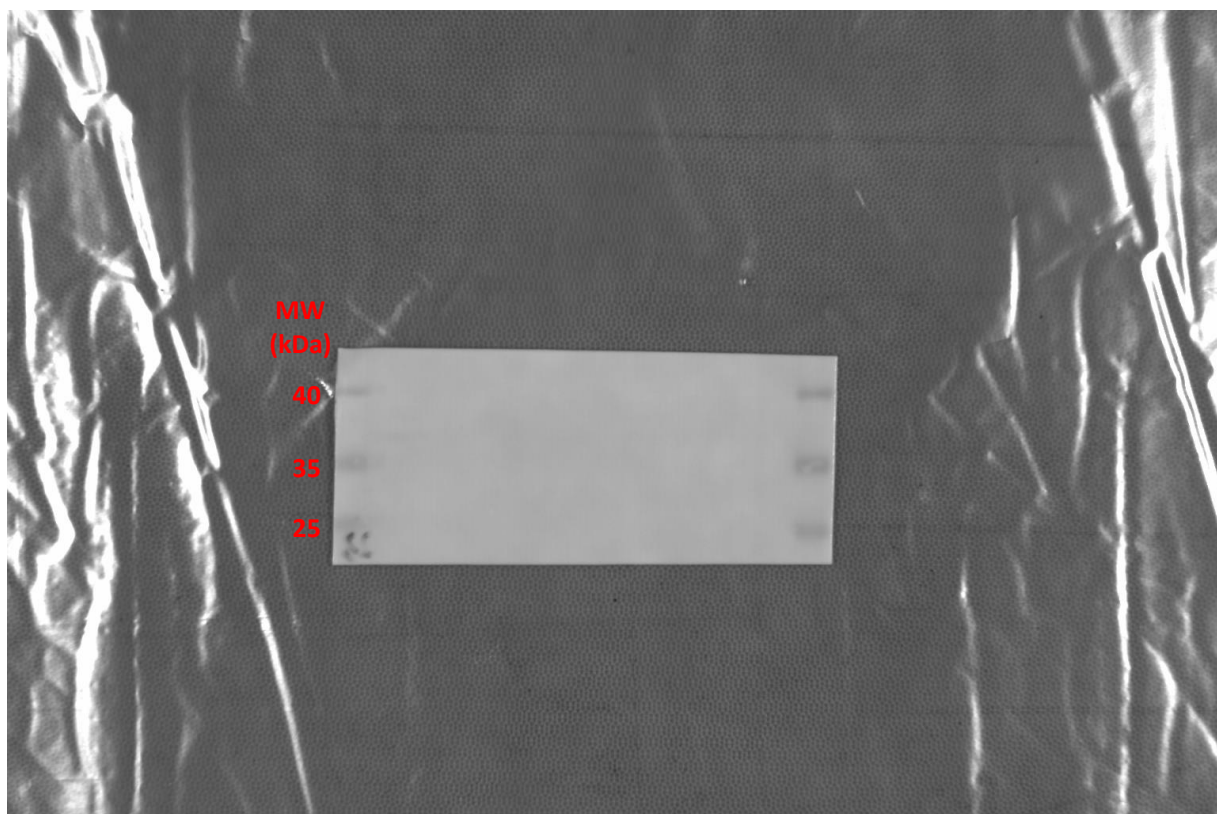

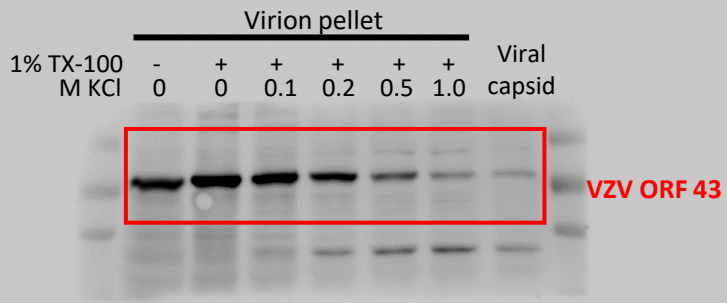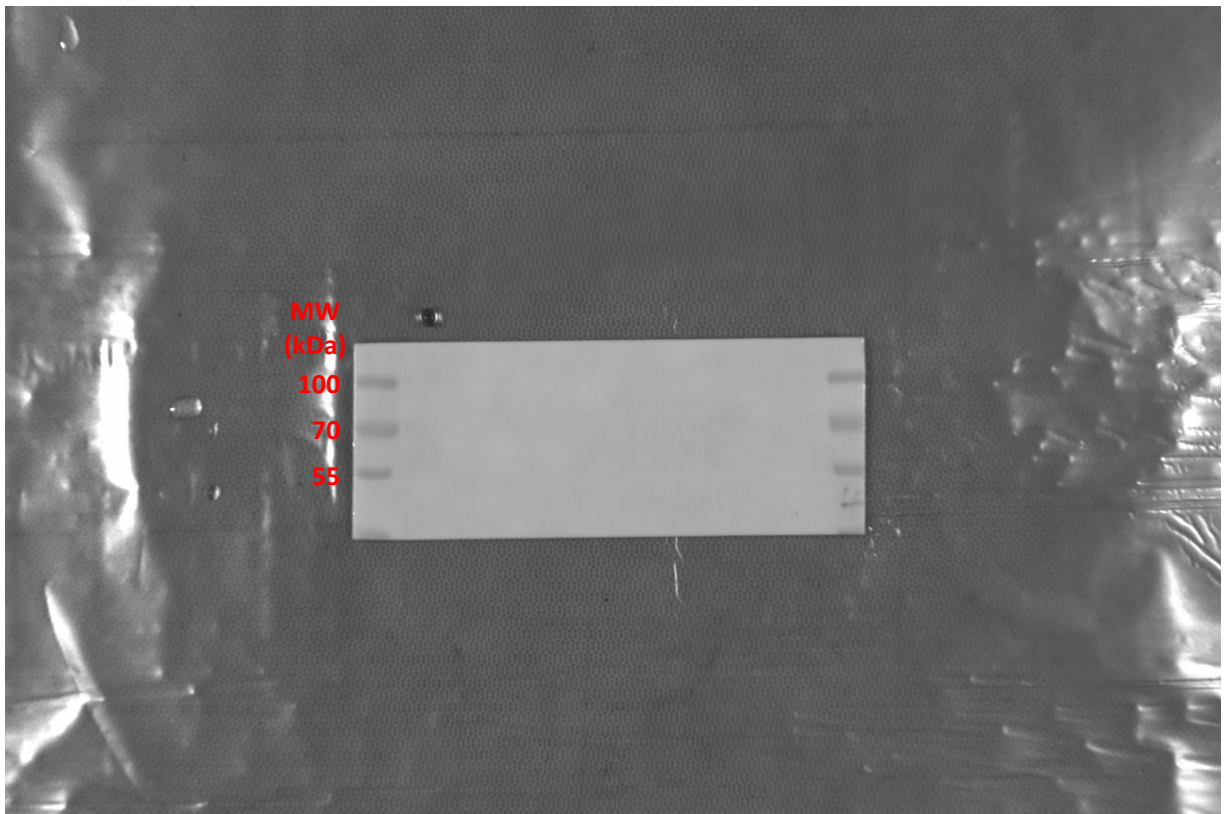

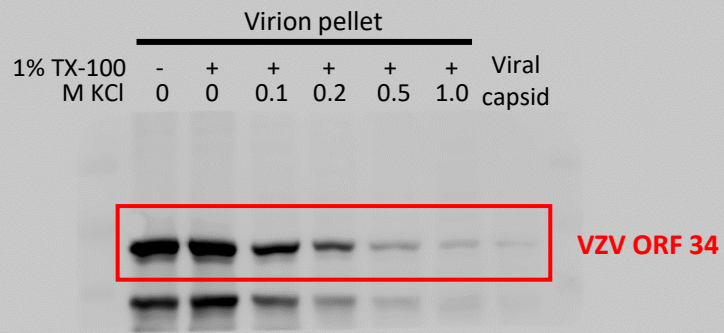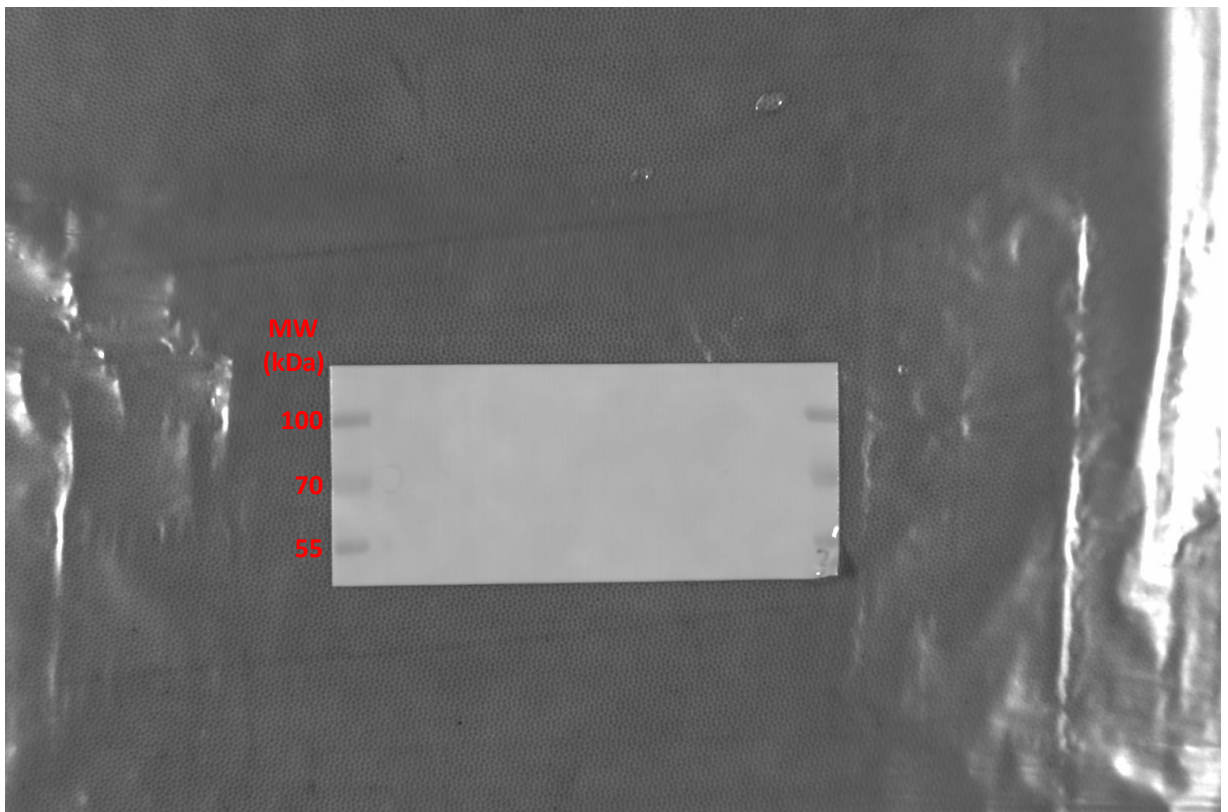

Supplement: NIHMS1630648-supplement-Source_Data_for_Figure_4d__Unprocessed_western_blots_.pdf [file NIHMS1630648-supplement-Source_Data_for_Figure_4d__Unprocessed_western_blots_.pdf]

**Ab-SCPn**

- + C

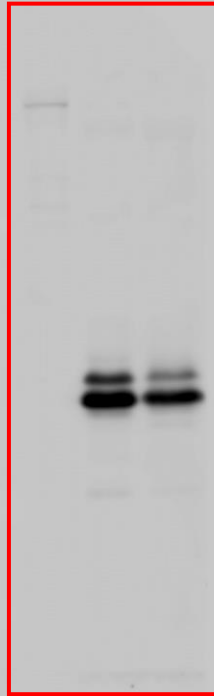

VZV ORF23

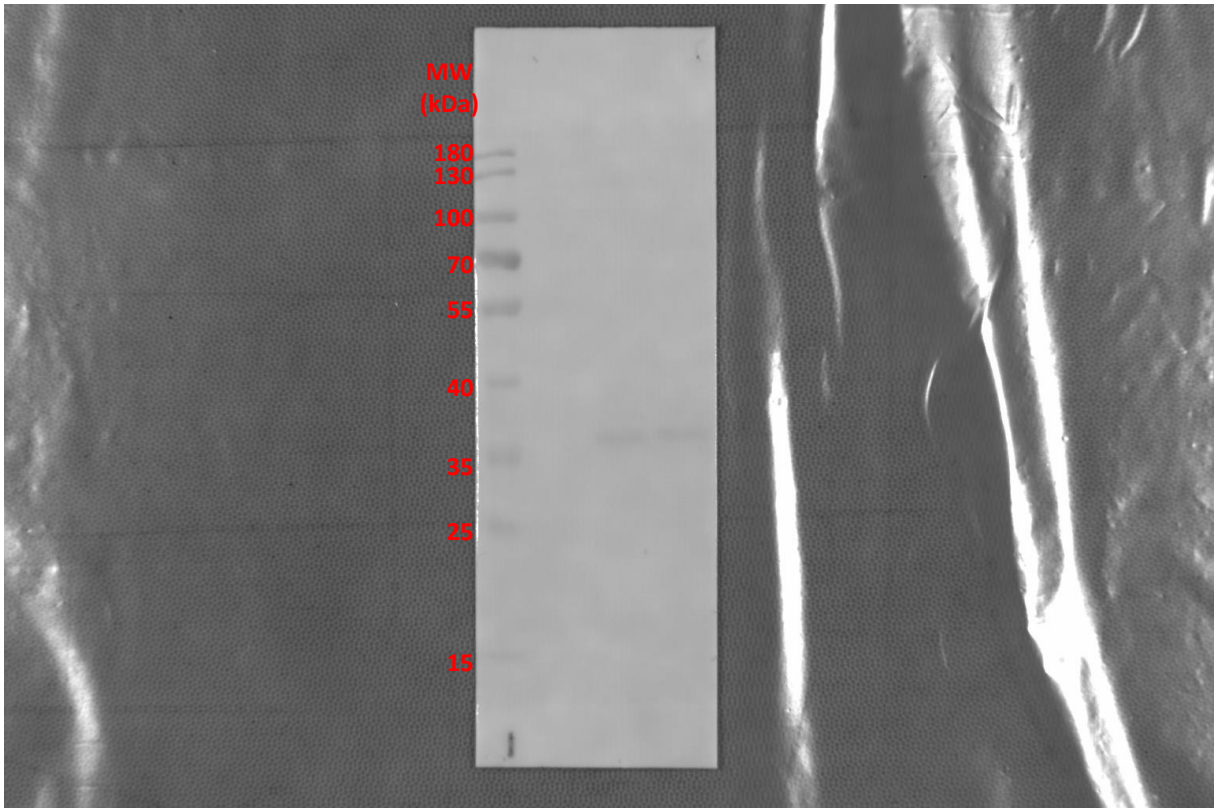

**Ab-SCPC**

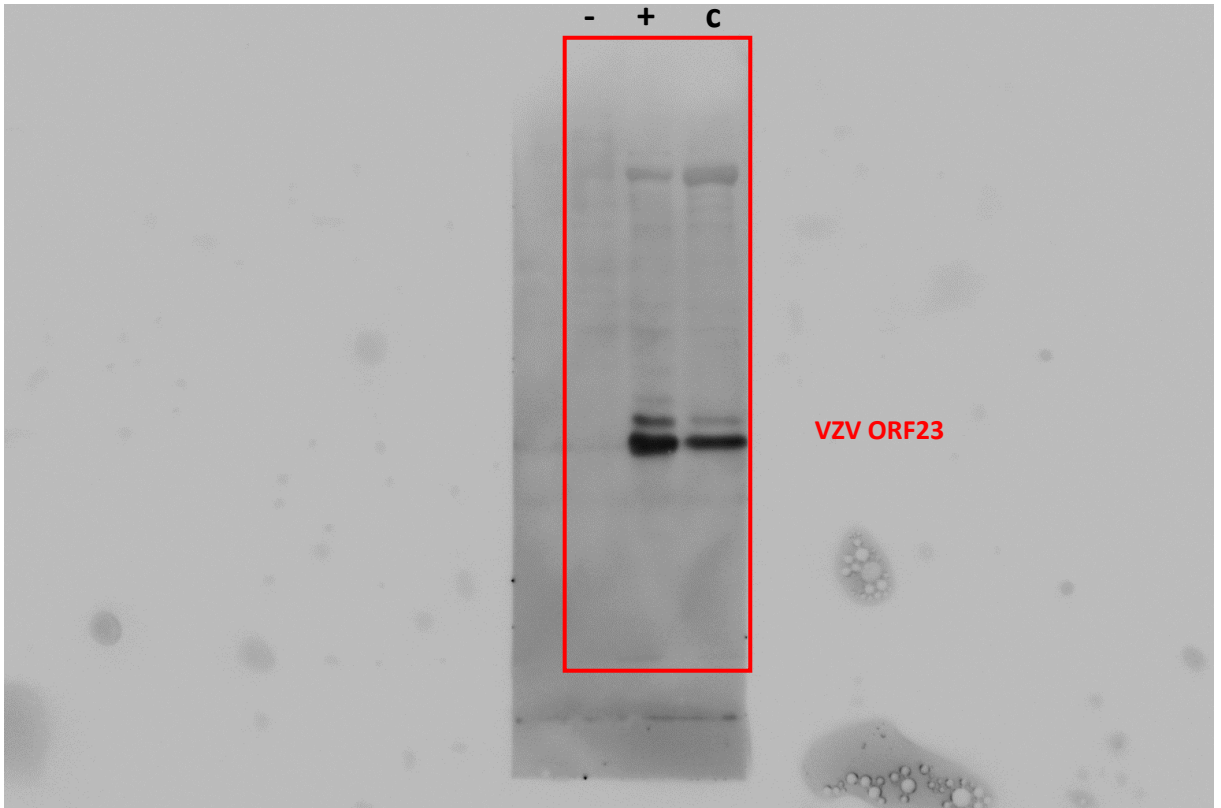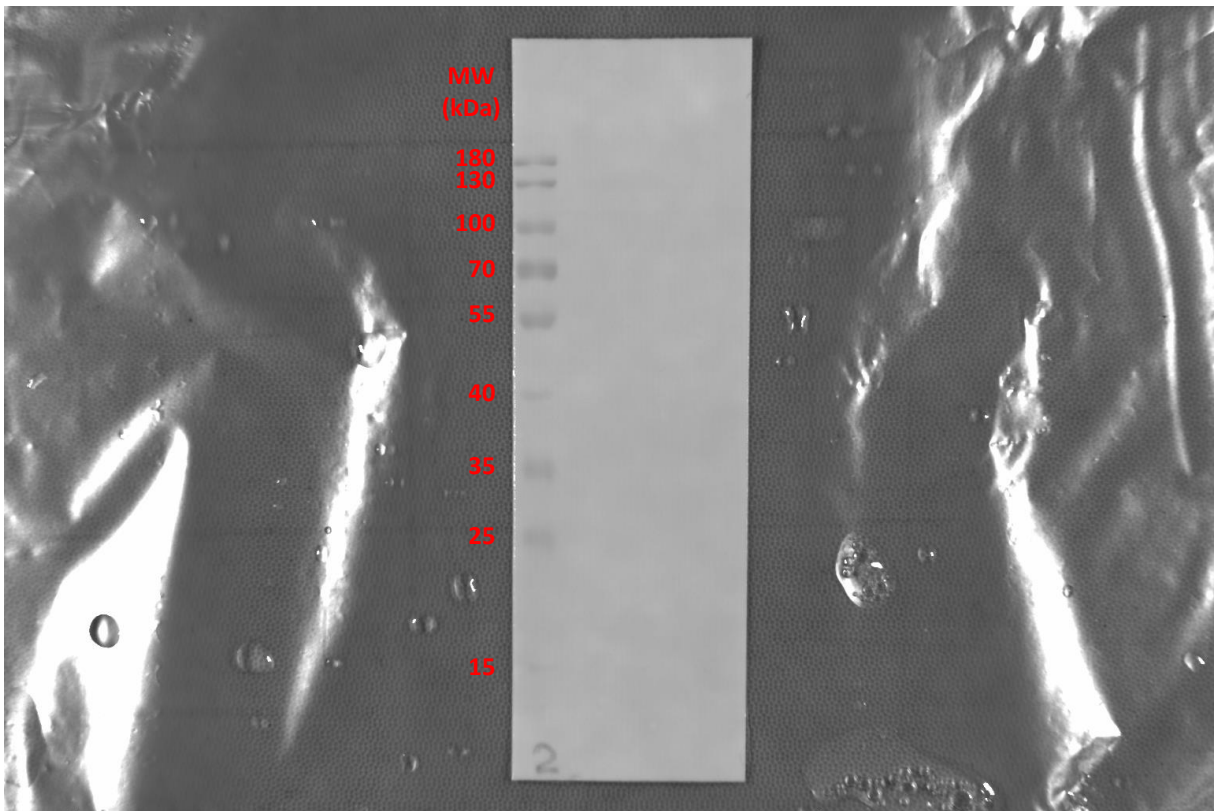

Supplement: NIHMS1630648-supplement-Source_Data_for_Figure_5a__Unprocessed_western_blots_.pdf [file NIHMS1630648-supplement-Source_Data_for_Figure_5a__Unprocessed_western_blots_.pdf]
